# Supplementary material
Source: PubMed Central journal article supplement (PMC1187976)

**a**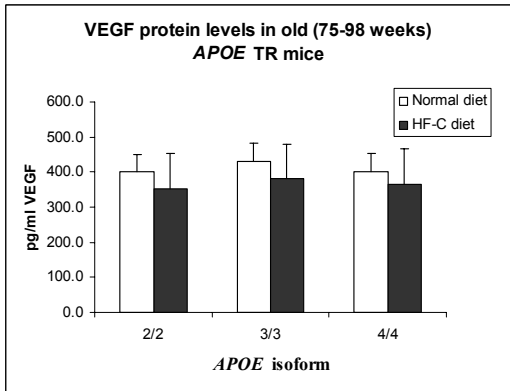**b**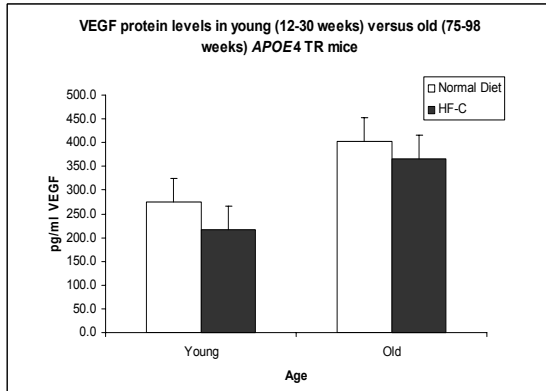

Supplement: pnas_0503015102_2.pdf [file pnas_0503015102_2.pdf]
